# Supplementary material for: Improving student understanding of lipids concepts in a biochemistry course using test-enhanced learning
Source: Royal Society of Chemistry journal article supplement (doi:10.1039/c5rp00133a), 2015-01-01
Supplement: c5rp00133a1.pdf [file c5rp00133a1.pdf]

## **Improving student understanding of lipids concepts in a biochemistry course using test-enhanced learning**

*Savannah Horn\* and Marcy Hernick\*†*

\*Department of Pharmaceutical Sciences, Appalachian College of Pharmacy, Oakwood, VA 24631

†To whom correspondence should be addressed: Marcy Hernick, Department of Pharmaceutical Sciences, Appalachian College of Pharmacy, Oakwood, VA. Phone: (276) 498-5244; email: [mhernick@acp.edu](mailto:mhernick@acp.edu)

### **APPENDIX - SUPPLEMENTARY TABLES**

Contents:

Table S1. Prior Biochemistry Course Experience

Table S2. Student Performance on Modules by Topic

Table S3. Student Performance on Modules by Question Type

Table S4. Student Performance on Formal Assessments by Topic

Table S5. Student Performance on Formal Assessments by Question Type

Table S6. Predicted Formal Assessment Performance Based on Modules

| Statistic                    | Cohort <sup>a</sup> | GPA <sup>b</sup> |            | Credit Hours |            |
|------------------------------|---------------------|------------------|------------|--------------|------------|
|                              |                     | Year 1           | Year 2     | Year 1       | Year 2     |
| N                            | Total               | 34 (46%)         | 36 (48%)   | 34 (46%)     | 36 (48%)   |
|                              | Non-repeat          | 27 (36.5%)       | 31 (41.3%) | 27 (36.5%)   | 31 (41.3%) |
|                              | Repeat              | 7 (9.5%)         | 5 (6.7%)   | 7 (9.5%)     | 5 (6.7%)   |
| Mean                         | Total               | 2.12             | 2.32       | 6.76         | 6.53       |
|                              | Non-Repeat          | 2.18             | 2.43       | 5.07         | 5.26       |
|                              | Repeat              | 1.87             | 1.69       | 13.3         | 14.4       |
| Median                       | Total               | 2.05             | 2.0        | 4.0          | 5.0        |
|                              | Non-Repeat          | 2.0              | 2.0        | 4.0          | 4.0        |
|                              | Repeat              | 2.1              | 1.5        | 12.0         | 13.0       |
| Standard Deviation           | Total               | 0.93             | 0.86       | 4.7          | 4.3        |
|                              | Non-Repeat          | 0.99             | 0.86       | 3.2          | 2.8        |
|                              | Repeat              | 0.60             | 0.57       | 3.7          | 3.9        |
| <i>p</i> -value <sup>c</sup> | Total               | 0.335            |            | 0.827        |            |

<sup>a</sup> Total refers to the statistics for all students that took biochemistry course(s) prior to enrolment. Non-repeat refers to the statistics for students that did not repeat previous biochemistry course(s) prior to enrolment. Repeat refers to the statistics for students that repeated one or more biochemistry course(s) prior to enrolment. <sup>b</sup> Grade point average (GPA) is out of a 4.0 scale. <sup>c</sup> P-values between years 1 and 2 for GPA and credit hours were calculated using the ANOVA function in KaleidaGraph (alpha = 0.05) for the Total students in each year.

Table S2. Student Performance on Modules by Topic

| Topic ( <i>N</i> ) <sup>a</sup>         | Parameter <sup>b</sup> | Mean (SD)   |             |             |            | Change ( <i>p</i> ) <sup>c</sup> |
|-----------------------------------------|------------------------|-------------|-------------|-------------|------------|----------------------------------|
|                                         |                        | First       | Last        | High        | All        |                                  |
| Cholesterol Metabolism & Transport (14) | Difficulty             | 55.4 (17.0) | 83.3 (10.5) | 87.1 (8.8)  | 72.3       | 31.7 (<0.0001)                   |
|                                         | DI                     | 42.7 (16.8) | 50.7 (11.9) | 42.8 (16.9) | 60.9 (9.0) |                                  |
| Eicosanoids (10)                        | Difficulty             | 52.5 (9.7)  | 84.5 (5.3)  | 86.8 (5.0)  | 71.3 (4.8) | 34.3 (<0.0001)                   |
|                                         | DI                     | 47.3 (9.7)  | 52.6 (12.3) | 43.1 (17.9) | 63.4 (5.5) |                                  |
| Ethanol Metabolism (4)                  | Difficulty             | 47.9 (14.7) | 81.2 (4.9)  | 85.4 (4.8)  | 68.4 (7.1) | 37.5 (0.0029)                    |
|                                         | DI                     | 51.9 (14.7) | 56.7 (6.8)  | 39.0 (10.0) | 65.0 (9.1) |                                  |
| Fatty Acid Metabolism & Transport (32)  | Difficulty             | 58.5 (13.2) | 85.0 (8.1)  | 90.0 (7.1)  | 74.6 (7.8) | 31.5 (<0.0001)                   |
|                                         | DI                     | 50.4 (11.6) | 58.9 (12.4) | 34.5 (20.0) | 65.1 (9.2) |                                  |
| General Properties (8)                  | Difficulty             | 74.4 (8.2)  | 90.6 (3.7)  | 94.2 (4.2)  | 82.9 (4.3) | 19.8 (<0.0001)                   |
|                                         | DI                     | 54.5 (9.4)  | 64.9 (9.0)  | 20.0 (19.4) | 68.0 (5.8) |                                  |
| Hormonal Regulation (15)                | Difficulty             | 56.9 (12.0) | 81.7 (7.2)  | 88.2 (5.3)  | 72.5 (7.5) | 31.3 (<0.0001)                   |
|                                         | DI                     | 47.3 (10.3) | 53.4 (11.9) | 40.3 (20.1) | 60.3 (8.9) |                                  |
| Steroids (6)                            | Difficulty             | 61.5 (17.9) | 89.7 (7.2)  | 90.5 (7.8)  | 77.1 (8.9) | 31.3 (0.0046)                    |
|                                         | DI                     | 49.6 (8.0)  | 52.1 (12.4) | 39.0 (17.1) | 64.5 (4.2) |                                  |
| <b>General</b>                          |                        |             |             |             |            |                                  |
| Metabolism (39)                         | Difficulty             | 58.2 (11.4) | 85.4 (6.5)  | 89.7 (5.7)  | 74.6 (6.4) | 31.5 (<0.0001)                   |
|                                         | DI                     | 50.1 (9.4)  | 57.7 (12.3) | 37.5 (18.6) | 65.2 (8.2) |                                  |
| Transport (13)                          | Difficulty             | 56.6 (18.6) | 85.7 (10.5) | 89.0 (9.6)  | 74.3       | 32.4 (<0.0001)                   |
|                                         | DI                     | 45.5 (18.4) | 55.7 (13.0) | 35.1 (19.8) | 62.4 (9.8) |                                  |
| Structure (9)                           | Difficulty             | 61.0 (16.7) | 86.4 (7.2)  | 88.7 (8.0)  | 75.2 (9.1) | 27.7 (0.00038)                   |
|                                         | DI                     | 51.9 (8.3)  | 56.1 (13.2) | 34 (21.3)   | 65.6 (3.2) |                                  |

<sup>a</sup> The number of questions (*N*) for each topic is shown in parentheses. Questions may fall into more than one topic, so the sum of individual topics is greater than the total number of questions. <sup>b</sup> Difficulty = facility index (or mean); DI = discrimination index. <sup>c</sup> *P*-values for response rates to first and high attempts were calculated using the ANOVA function in KaleidaGraph with an alpha = 0.05.

Table S3. Student Performance on Modules by Question Type

| Type (N) <sup>a</sup> | Parameter <sup>b</sup> | Mean (SD)   |             |             |            | Change (p) <sup>c</sup> |
|-----------------------|------------------------|-------------|-------------|-------------|------------|-------------------------|
|                       |                        | First       | Last        | High        | All        |                         |
| All (74)              | Difficulty             | 58.3 (14.1) | 85.6 (7.1)  | 89.6 (6.4)  | 74.7 (7.8) | 31.3 (<0.0001)          |
|                       | DI                     | 49.2 (11.6) | 56.9 (12.2) | 37.1 (19.3) | 64.6 (7.7) |                         |
| A-Type (23)           | Difficulty             | 60.0 (14.5) | 88.0 (5.7)  | 91.5 (5.6)  | 76.4 (7.0) | 31.5 (<0.0001)          |
|                       | DI                     | 48.1 (11.5) | 58.0 (12.4) | 32.6 (19.0) | 65.1 (5.2) |                         |
| K-Type (15)           | Difficulty             | 46.5 (14.9) | 80.5 (9.6)  | 85.5 (8.3)  | 69.3 (9.6) | 39.0 (<0.0001)          |
|                       | DI                     | 43.0 (12.7) | 53.6 (10.2) | 46.6 (19.3) | 60.3 (7.6) |                         |
| SATA (18)             | Difficulty             | 62.9 (7.6)  | 85.2 (5.7)  | 89.8 (5.1)  | 75.2 (5.8) | 27.0 (<0.0001)          |
|                       | DI                     | 55.3 (12.1) | 59.5 (12.7) | 32.1 (18.8) | 68.3 (9.8) |                         |
| Matching (17)         | Difficulty             | 61.9 (13.7) | 87.7 (5.8)  | 90.3 (5.9)  | 76.9 (7.6) | 28.4 (<0.0001)          |
|                       | DI                     | 49.8 (7.1)  | 55.6 (13.6) | 39.8 (18.6) | 63.8 (6.8) |                         |
| FITB/Numerical (1)    | Difficulty             | 50.0 (-)    | 82.4 (-)    | 90.5 (-)    | 73.2 (-)   | 40.5 (-)                |
|                       | DI                     | 44.8 (-)    | 56.6 (-)    | 44.8 (-)    | 65.9 (-)   |                         |

<sup>a</sup> The number of questions (N) for each question type is shown in parentheses. <sup>b</sup> Difficulty = facility index (or mean); DI = discrimination index. <sup>c</sup> P-values for response rates to first and high attempts were calculated using the ANOVA function in KaleidaGraph with an alpha = 0.05.

Table S4. Student Performance on Formal Assessments by Topic

| Topic                              | Parameter <sup>a</sup> | Mean (SD)   |             |             |             |
|------------------------------------|------------------------|-------------|-------------|-------------|-------------|
|                                    |                        | Yr 1: Quiz  | Yr 1: Exam  | Yr 2: Quiz  | Yr 2: Exam  |
| All                                | Number                 | 16          | 29          | 18          | 25          |
|                                    | Difficulty             | 79.0 (11.9) | 63.4 (26.9) | 69.9 (18.7) | 80.3 (19.7) |
|                                    | DI                     | 26.3 (14.3) | 27.8 (20.0) | 40.4 (22.5) | 29.2 (18.9) |
| Structure-based                    | Number                 | 1           | 2           | 4           | 2           |
|                                    | Difficulty             | 72.6 (-)    | 77.8 (2.9)  | 82.3 (14.2) | 78.0 (4.2)  |
|                                    | DI                     | 28.0 (-)    | 22.5 (17.7) | 35.0 (27.0) | 32.5 (3.5)  |
| <i>Lipids I</i>                    | Number                 | 13          | 13          | 11          | 13          |
|                                    | Difficulty             | 76.1 (11.3) | 70.3 (24.6) | 76.0 (17.5) | 85.1 (13.3) |
|                                    | DI                     | 29.8 (13.3) | 23.8 (18.1) | 35.4 (20.8) | 22.8 (19.4) |
| Ethanol Metabolism                 | Number                 | 1           | 2           | 1           | 2           |
|                                    | Difficulty             | 86.3 (-)    | 47.3 (15.3) | 68.0 (-)    | 87.0 (8.5)  |
|                                    | DI                     | 21.0 (-)    | 42.5 (10.6) | 65.0 (-)    | 25.0 (21.2) |
| Fatty Acid Metabolism & Transport  | Number                 | 9           | 9           | 7           | 8           |
|                                    | Difficulty             | 75.3 (13.1) | 72.4 (26.3) | 71.0 (18.9) | 83.4 (15.7) |
|                                    | DI                     | 31.7 (15.6) | 22.2 (18.9) | 35.6 (22.1) | 24.5 (22.7) |
| General Properties                 | Number                 | 1           | 1           | 2           | 1           |
|                                    | Difficulty             | 72.6 (-)    | 79.7 (-)    | 92.0 (5.7)  | 75.0 (-)    |
|                                    | DI                     | 28.0 (-)    | 10.0 (-)    | 20.0 (7.1)  | 30.0 (-)    |
| Hormonal Regulation                | Number                 | 8           | 6           | 7           | 4           |
|                                    | Difficulty             | 70.7 (9.7)  | 80.9 (11.2) | 72.7 (14.0) | 87.5 (11.0) |
|                                    | DI                     | 37.0 (10.3) | 24.1 (20.4) | 43.1 (19.8) | 21.5 (14.1) |
| <i>Lipids II</i>                   | Number                 | 3           | 16          | 7           | 12          |
|                                    | Difficulty             | 91.8 (2.7)  | 57.7 (28.2) | 60.4 (17.7) | 75.1 (24.4) |
|                                    | DI                     | 11.0 (5.3)  | 30.9 (21.4) | 48.4 (24.2) | 36.3 (16.4) |
| Cholesterol Metabolism & Transport | Number                 | 4           | 7           | 3           | 7           |
|                                    | Difficulty             | 87.0 (9.8)  | 50.8 (22.1) | 50.2 (18.1) | 68.4 (30.0) |
|                                    | DI                     | 13.5 (6.6)  | 35.7 (27.0) | 52.7 (30.4) | 36.4 (16.3) |
| Eicosanoids                        | Number                 | -           | 7           | 2           | 5           |
|                                    | Difficulty             | -           | 55.4 (32.9) | 56.0 (9.4)  | 84.6 (10.1) |
|                                    | DI                     | -           | 31.4 (16.8) | 63.0 (17.0) | 34.0 (21.6) |
| Steroids                           | Number                 | -           | 2           | 2           | 1           |
|                                    | Difficulty             | -           | 90.1 (3.2)  | 80.0 (3.8)  | 95.9 (-)    |
|                                    | DI                     | -           | 12.5 (3.5)  | 27.5 (3.5)  | 15.0 (-)    |

<sup>a</sup> N = number of questions for each topic. <sup>b</sup> Difficulty = facility index (or mean); DI = discrimination index.

Table S5. Student Performance on Formal Assessments by Question Type

| Type           | Parameter <sup>a</sup> | Mean (SD)   |                             |                             |                             |
|----------------|------------------------|-------------|-----------------------------|-----------------------------|-----------------------------|
|                |                        | Yr 1: Quiz  | Yr 1: Exam                  | Yr 2: Quiz                  | Yr 2: Exam                  |
| All            | Number                 | 16          | 29                          | 18                          | 25                          |
|                | Difficulty             | 79.0 (11.9) | 63.4 (26.9)<br>70.6 (19.7)* | 69.9 (18.7)<br>71.9 (19.5)* | 80.3 (19.7)<br>84.4 (15.8)* |
|                | DI                     | 26.3 (14.3) | 27.8 (20.0)                 | 40.4 (22.5)                 | 29.2 (18.9)                 |
|                | Point Biserial         | 33.4 (10.9) | 26.2 (14.6)                 | 38.3 (14.6)                 | 30.0 (12.1)                 |
| A-Type         | Number                 | 5           | 4                           | 7                           | 8                           |
|                | Difficulty             | 84.1 (10.7) | 70.3 (22.2)                 | 74.1 (16.2)                 | 84.8 (21.8)                 |
|                | DI                     | 14.0 (10.0) | 27.5 (18.5)                 | 36.7 (20.2)                 | 22.5 (17.9)                 |
|                | Point Biserial         | 20.6 (8.4)  | 24.0 (14.8)                 | 34.7 (13.4)                 | 24.9 (13.1)                 |
| K-Type         | Number                 | 10          | 18                          | 6                           | 8                           |
|                | Difficulty             | 76.3 (12.8) | 70.1 (21.8)                 | 54.9 (16.8)                 | 83.3 (10.8)                 |
|                | DI                     | 32.7 (12.9) | 26.7 (19.8)                 | 51.8 (19.6)                 | 29.5 (25.0)                 |
|                | Point Biserial         | 39.9 (5.3)  | 25.6 (15.0)                 | 42.3 (13.6)                 | 30.8 (15.3)                 |
| SATA           | Number                 | -           | -                           | 2                           | 2                           |
|                | Difficulty             | -           | -                           | 84.5 (10.6)<br>92.0 (2.8)   | 90.5 (3.5)<br>96.0 (1.4)*   |
|                | DI                     | -           | -                           | 35.0 (28.3)                 | 22.5 (10.6)                 |
|                | Point Biserial         | -           | -                           | 44.5 (16.3)                 | 31.5 (2.1)                  |
| Matching       | Number                 | -           | 1                           | 2                           | 5                           |
|                | Difficulty             | -           | 76.0 (-)<br>88.0 (-)*       | 74.0 (19.8)<br>84.0 (12.7)* | 80.6 (11.1)<br>88.0 (6.8)*  |
|                | DI                     | -           | 75.0 (-)                    | 45.0 (28.2)                 | 36.0 (10.8)                 |
|                | Point Biserial         | -           | 55.0 (-)                    | 46.0 (15.6)                 | 34.8 (7.4)                  |
| FITB/Numerical | Number                 | 1           | 6                           | 1                           | 2                           |
|                | Difficulty             | 80.8 (-)    | 36.5 (32.3)<br>69.2 (13.5)* | 93.3 (-)<br>93.3 (-)        | 39.0 (28.2)<br>66.5 (26.2)  |
|                | DI                     | 24.0 (-)    | 23.3 (15.4)                 | 0 (-)                       | 45.0 (14.1)                 |
|                | Point Biserial         | 32.0 (-)    | 24.8 (11.3)                 | 11.0 (-)                    | 34.5 (9.2)                  |

<sup>a</sup> The number of questions (*N*) for each question type is shown in parentheses. Difficulty = facility index (or mean); DI = discrimination index. \*Reflects scoring with partial credit.

Table S6. Predicted Performance Based on Modules

| Assessment  | Number of Questions | Parameter <sup>a</sup> | Module Performance Mean (SD) |             |             |            | Assessment Mean (SD) |
|-------------|---------------------|------------------------|------------------------------|-------------|-------------|------------|----------------------|
|             |                     |                        | First                        | Last        | High        | All        |                      |
| Quiz Year 1 | 16                  | Difficulty             | 56.7                         | 84.3 (6.7)  | 89.8 (5.7)  | 73.2 (7.4) | 79.0 (11.9)          |
|             |                     | DI                     | 49.6                         | 55.1 (11.7) | 36.4 (19.8) | 63.2 (9.1) | 26.3 (14.3)          |
| Exam Year 1 | 30                  | Difficulty             | 55.8                         | 84.3 (8.7)  | 88.1 (7.2)  | 72.9 (8.6) | 70.6 (19.7)          |
|             |                     | DI                     | 45.5                         | 54.0 (11.3) | 41.6 (13.1) | 62.3 (7.9) | 27.8 (20.0)          |
| Quiz Year 2 | 16                  | Difficulty             | 55.8                         | 84.0 (7.1)  | 88.5 (5.2)  | 73.3 (7.7) | 71.9 (19.5)          |
|             |                     | DI                     | 49.0                         | 54.9 (12.3) | 38.3 (21.5) | 60.9 (8.3) | 40.4 (22.5)          |
| Exam Year 2 | 25                  | Difficulty             | 55.7                         | 85.1 (5.5)  | 88.7 (5.5)  | 73.3 (7.1) | 84.4 (15.8)          |
|             |                     | DI                     | 46.5                         | 57.2 (10.9) | 42.1 (17.1) | 65.2 (8.0) | 29.2 (18.9)          |

<sup>a</sup> Difficulty = facility index (or mean). Since Moodle scores all questions with partial credit, the formal assessment scores shown are adjusted for partial credit. DI = discrimination index.
